# Supplementary material for: LLM-powered threat intelligence: a retrieval-augmented generation approach for cyber attack investigation
Source: PeerJ journal article supplement (doi:10.7717/peerj-cs.3371), 2025-11-14
Supplement: ctitaa.xlsx [file ctitaa.xlsx]

## Sheet: Sheet1
query	ground_truth
You are given a threat report that describes a cyber incident. Any direct mentions of threat actor groups, campaign names, or malware names have been replaced with [PLACEHOLDER]. Your task is to attribute the incident to a known threat actor or malware. Map it to relevant MITRE ATT&CK threat groups (e.g., APT36) or Software/Tools (e.g., Crimson RAT - S0334). Threat Report: SEQRITE Labs APT-Team h…	SideCopy
You are given a threat report that describes a cyber incident. Any direct mentions of threat actor groups, campaign names, or malware names have been replaced with [PLACEHOLDER]. Your task is to attribute the incident to a known threat actor or malware. Map it to relevant MITRE ATT&CK threat groups (e.g., APT36) or Software/Tools (e.g., Crimson RAT - S0334). Threat Report: The recent ethnic rebel…	Stately Taurus (alias Bronze President, Camaro Dragon, Earth Preta, Mustang Panda, Red Delta and Luminous Moth)
You are given a threat report that describes a cyber incident. Any direct mentions of threat actor groups, campaign names, or malware names have been replaced with [PLACEHOLDER]. Your task is to attribute the incident to a known threat actor or malware. Map it to relevant MITRE ATT&CK threat groups (e.g., APT36) or Software/Tools (e.g., Crimson RAT - S0334). Threat Report: An advanced persistent …	Stately Taurus
You are given a threat report that describes a cyber incident. Any direct mentions of threat actor groups, campaign names, or malware names have been replaced with [PLACEHOLDER]. Your task is to attribute the incident to a known threat actor or malware. Map it to relevant MITRE ATT&CK threat groups (e.g., APT36) or Software/Tools (e.g., Crimson RAT - S0334). Threat Report: [PLACEHOLDER], a notori…	Emotet
You are given a threat report that describes a cyber incident. Any direct mentions of threat actor groups, campaign names, or malware names have been replaced with [PLACEHOLDER]. Your task is to attribute the incident to a known threat actor or malware. Map it to relevant MITRE ATT&CK threat groups (e.g., APT36) or Software/Tools (e.g., Crimson RAT - S0334). Threat Report: Bandook malware is a re…	APT-C-23 ( FrozenCell or Two-tailed Scorpion)
You are given a threat report that describes a cyber incident. Any direct mentions of threat actor groups, campaign names, or malware names have been replaced with [PLACEHOLDER]. Your task is to attribute the incident to a known threat actor or malware. Map it to relevant MITRE ATT&CK threat groups (e.g., APT36) or Software/Tools (e.g., Crimson RAT - S0334). Threat Report: Since 2021, Check Point…	Sharp Dragon (or Sharp Panda)
You are given a threat report that describes a cyber incident. Any direct mentions of threat actor groups, campaign names, or malware names have been replaced with [PLACEHOLDER]. Your task is to attribute the incident to a known threat actor or malware. Map it to relevant MITRE ATT&CK threat groups (e.g., APT36) or Software/Tools (e.g., Crimson RAT - S0334). Threat Report: Since mid-April 2024, M…	Storm-1811
You are given a threat report that describes a cyber incident. Any direct mentions of threat actor groups, campaign names, or malware names have been replaced with [PLACEHOLDER]. Your task is to attribute the incident to a known threat actor or malware. Map it to relevant MITRE ATT&CK threat groups (e.g., APT36) or Software/Tools (e.g., Crimson RAT - S0334). Threat Report: [PLACEHOLDER] has been …	APT-C-36, also known as Blind Eagle
You are given a threat report that describes a cyber incident. Any direct mentions of threat actor groups, campaign names, or malware names have been replaced with [PLACEHOLDER]. Your task is to attribute the incident to a known threat actor or malware. Map it to relevant MITRE ATT&CK threat groups (e.g., APT36) or Software/Tools (e.g., Crimson RAT - S0334). Threat Report: ACTIVE CAMPAIGNS AGAINS…	APT-C-36, also known as Blind Eagle
You are given a threat report that describes a cyber incident. Any direct mentions of threat actor groups, campaign names, or malware names have been replaced with [PLACEHOLDER]. Your task is to attribute the incident to a known threat actor or malware. Map it to relevant MITRE ATT&CK threat groups (e.g., APT36) or Software/Tools (e.g., Crimson RAT - S0334). Threat Report: USB Spreading As Mandia…	ANDROMEDA
You are given a threat report that describes a cyber incident. Any direct mentions of threat actor groups, campaign names, or malware names have been replaced with [PLACEHOLDER]. Your task is to attribute the incident to a known threat actor or malware. Map it to relevant MITRE ATT&CK threat groups (e.g., APT36) or Software/Tools (e.g., Crimson RAT - S0334). Threat Report: Recently Telsy observed…	Venomous Bear (or Turla or Uroburos)
You are given a threat report that describes a cyber incident. Any direct mentions of threat actor groups, campaign names, or malware names have been replaced with [PLACEHOLDER]. Your task is to attribute the incident to a known threat actor or malware. Map it to relevant MITRE ATT&CK threat groups (e.g., APT36) or Software/Tools (e.g., Crimson RAT - S0334). Threat Report: During December 15-25, …	APT29 (Cozy Bear / The Dukes)
You are given a threat report that describes a cyber incident. Any direct mentions of threat actor groups, campaign names, or malware names have been replaced with [PLACEHOLDER]. Your task is to attribute the incident to a known threat actor or malware. Map it to relevant MITRE ATT&CK threat groups (e.g., APT36) or Software/Tools (e.g., Crimson RAT - S0334). Threat Report: During April 2023, the …	Gamaredon (APT-C-53, Primitive Bear, Armageddon)
You are given a threat report that describes a cyber incident. Any direct mentions of threat actor groups, campaign names, or malware names have been replaced with [PLACEHOLDER]. Your task is to attribute the incident to a known threat actor or malware. Map it to relevant MITRE ATT&CK threat groups (e.g., APT36) or Software/Tools (e.g., Crimson RAT - S0334). Threat Report: The Microsoft security …	Midnight Blizzard ( NOBELIUM)
You are given a threat report that describes a cyber incident. Any direct mentions of threat actor groups, campaign names, or malware names have been replaced with [PLACEHOLDER]. Your task is to attribute the incident to a known threat actor or malware. Map it to relevant MITRE ATT&CK threat groups (e.g., APT36) or Software/Tools (e.g., Crimson RAT - S0334). Threat Report: Rapid7 has identified a…	Black Basta
You are given a threat report that describes a cyber incident. Any direct mentions of threat actor groups, campaign names, or malware names have been replaced with [PLACEHOLDER]. Your task is to attribute the incident to a known threat actor or malware. Map it to relevant MITRE ATT&CK threat groups (e.g., APT36) or Software/Tools (e.g., Crimson RAT - S0334). Threat Report: [PLACEHOLDER] is a cybe…	OilRig, APT34, Lyceum, or Siamesekitten
You are given a threat report that describes a cyber incident. Any direct mentions of threat actor groups, campaign names, or malware names have been replaced with [PLACEHOLDER]. Your task is to attribute the incident to a known threat actor or malware. Map it to relevant MITRE ATT&CK threat groups (e.g., APT36) or Software/Tools (e.g., Crimson RAT - S0334). Threat Report: On December 2022, we id…	APT34
You are given a threat report that describes a cyber incident. Any direct mentions of threat actor groups, campaign names, or malware names have been replaced with [PLACEHOLDER]. Your task is to attribute the incident to a known threat actor or malware. Map it to relevant MITRE ATT&CK threat groups (e.g., APT36) or Software/Tools (e.g., Crimson RAT - S0334). Threat Report: In the past month, we i…	Earth Freybug ( subset of APT41)
You are given a threat report that describes a cyber incident. Any direct mentions of threat actor groups, campaign names, or malware names have been replaced with [PLACEHOLDER]. Your task is to attribute the incident to a known threat actor or malware. Map it to relevant MITRE ATT&CK threat groups (e.g., APT36) or Software/Tools (e.g., Crimson RAT - S0334). Threat Report: Operation Blacksmith in…	Lazarus
You are given a threat report that describes a cyber incident. Any direct mentions of threat actor groups, campaign names, or malware names have been replaced with [PLACEHOLDER]. Your task is to attribute the incident to a known threat actor or malware. Map it to relevant MITRE ATT&CK threat groups (e.g., APT36) or Software/Tools (e.g., Crimson RAT - S0334). Threat Report: Symantec‚Äôs Threat Hun…	Springtail espionage group (or Kimsuky)
You are given a threat report that describes a cyber incident. Any direct mentions of threat actor groups, campaign names, or malware names have been replaced with [PLACEHOLDER]. Your task is to attribute the incident to a known threat actor or malware. Map it to relevant MITRE ATT&CK threat groups (e.g., APT36) or Software/Tools (e.g., Crimson RAT - S0334). Threat Report: The Securonix Threat Re…	Kimsuky
You are given a threat report that describes a cyber incident. Any direct mentions of threat actor groups, campaign names, or malware names have been replaced with [PLACEHOLDER]. Your task is to attribute the incident to a known threat actor or malware. Map it to relevant MITRE ATT&CK threat groups (e.g., APT36) or Software/Tools (e.g., Crimson RAT - S0334). Threat Report: In the recent past, cyb…	Transparent Tribe (APT36)
You are given a threat report that describes a cyber incident. Any direct mentions of threat actor groups, campaign names, or malware names have been replaced with [PLACEHOLDER]. Your task is to attribute the incident to a known threat actor or malware. Map it to relevant MITRE ATT&CK threat groups (e.g., APT36) or Software/Tools (e.g., Crimson RAT - S0334). Threat Report: Since November 2023, Mi…	Mint Sandstorm (PHOSPHORUS)
You are given a threat report that describes a cyber incident. Any direct mentions of threat actor groups, campaign names, or malware names have been replaced with [PLACEHOLDER]. Your task is to attribute the incident to a known threat actor or malware. Map it to relevant MITRE ATT&CK threat groups (e.g., APT36) or Software/Tools (e.g., Crimson RAT - S0334). Threat Report: Despite the large numbe…	MuddyWater
You are given a threat report that describes a cyber incident. Any direct mentions of threat actor groups, campaign names, or malware names have been replaced with [PLACEHOLDER]. Your task is to attribute the incident to a known threat actor or malware. Map it to relevant MITRE ATT&CK threat groups (e.g., APT36) or Software/Tools (e.g., Crimson RAT - S0334). Threat Report: [PLACEHOLDER] has been …	Seedworm (or Muddywater)
You are given a threat report that describes a cyber incident. Any direct mentions of threat actor groups, campaign names, or malware names have been replaced with [PLACEHOLDER]. Your task is to attribute the incident to a known threat actor or malware. Map it to relevant MITRE ATT&CK threat groups (e.g., APT36) or Software/Tools (e.g., Crimson RAT - S0334). Threat Report: Through its managed sec…	CharmingCypress (aka Charming Kitten, APT42, TA453)
You are given a threat report that describes a cyber incident. Any direct mentions of threat actor groups, campaign names, or malware names have been replaced with [PLACEHOLDER]. Your task is to attribute the incident to a known threat actor or malware. Map it to relevant MITRE ATT&CK threat groups (e.g., APT36) or Software/Tools (e.g., Crimson RAT - S0334). Threat Report: Over the past several m…	Mint Sandstorm
You are given a threat report that describes a cyber incident. Any direct mentions of threat actor groups, campaign names, or malware names have been replaced with [PLACEHOLDER]. Your task is to attribute the incident to a known threat actor or malware. Map it to relevant MITRE ATT&CK threat groups (e.g., APT36) or Software/Tools (e.g., Crimson RAT - S0334). Threat Report: [PLACEHOLDER] is a long…	APT31, also known as BRONZE VINEWOOD, Zirconium or Judgment Panda
You are given a threat report that describes a cyber incident. Any direct mentions of threat actor groups, campaign names, or malware names have been replaced with [PLACEHOLDER]. Your task is to attribute the incident to a known threat actor or malware. Map it to relevant MITRE ATT&CK threat groups (e.g., APT36) or Software/Tools (e.g., Crimson RAT - S0334). Threat Report: [PLACEHOLDER] is a uniq…	Gamaredon, also known as Primitive Bear, ACTINIUM, and Shuckworm
You are given a threat report that describes a cyber incident. Any direct mentions of threat actor groups, campaign names, or malware names have been replaced with [PLACEHOLDER]. Your task is to attribute the incident to a known threat actor or malware. Map it to relevant MITRE ATT&CK threat groups (e.g., APT36) or Software/Tools (e.g., Crimson RAT - S0334). Threat Report: The [PLACEHOLDER] has b…	Gamaredon Group
You are given a threat report that describes a cyber incident. Any direct mentions of threat actor groups, campaign names, or malware names have been replaced with [PLACEHOLDER]. Your task is to attribute the incident to a known threat actor or malware. Map it to relevant MITRE ATT&CK threat groups (e.g., APT36) or Software/Tools (e.g., Crimson RAT - S0334). Threat Report: In 2021, Check Point Re…	Sharp Panda
You are given a threat report that describes a cyber incident. Any direct mentions of threat actor groups, campaign names, or malware names have been replaced with [PLACEHOLDER]. Your task is to attribute the incident to a known threat actor or malware. Map it to relevant MITRE ATT&CK threat groups (e.g., APT36) or Software/Tools (e.g., Crimson RAT - S0334). Threat Report: Cisco Talos discovered …	Bitter
You are given a threat report that describes a cyber incident. Any direct mentions of threat actor groups, campaign names, or malware names have been replaced with [PLACEHOLDER]. Your task is to attribute the incident to a known threat actor or malware. Map it to relevant MITRE ATT&CK threat groups (e.g., APT36) or Software/Tools (e.g., Crimson RAT - S0334). Threat Report: The Lookout Threat Inte…	Confucius
You are given a threat report that describes a cyber incident. Any direct mentions of threat actor groups, campaign names, or malware names have been replaced with [PLACEHOLDER]. Your task is to attribute the incident to a known threat actor or malware. Map it to relevant MITRE ATT&CK threat groups (e.g., APT36) or Software/Tools (e.g., Crimson RAT - S0334). Threat Report: The energy sector in Eu…	Dragonfly
You are given a threat report that describes a cyber incident. Any direct mentions of threat actor groups, campaign names, or malware names have been replaced with [PLACEHOLDER]. Your task is to attribute the incident to a known threat actor or malware. Map it to relevant MITRE ATT&CK threat groups (e.g., APT36) or Software/Tools (e.g., Crimson RAT - S0334). Threat Report: AhnLab SEcurity intelli…	Andariel
You are given a threat report that describes a cyber incident. Any direct mentions of threat actor groups, campaign names, or malware names have been replaced with [PLACEHOLDER]. Your task is to attribute the incident to a known threat actor or malware. Map it to relevant MITRE ATT&CK threat groups (e.g., APT36) or Software/Tools (e.g., Crimson RAT - S0334). Threat Report: Over the years, TAG has…	COLDRIVER (also known as UNC4057, Star Blizzard and Callisto)
You are given a threat report that describes a cyber incident. Any direct mentions of threat actor groups, campaign names, or malware names have been replaced with [PLACEHOLDER]. Your task is to attribute the incident to a known threat actor or malware. Map it to relevant MITRE ATT&CK threat groups (e.g., APT36) or Software/Tools (e.g., Crimson RAT - S0334). Threat Report: ESET researchers have i…	Bahamut
You are given a threat report that describes a cyber incident. Any direct mentions of threat actor groups, campaign names, or malware names have been replaced with [PLACEHOLDER]. Your task is to attribute the incident to a known threat actor or malware. Map it to relevant MITRE ATT&CK threat groups (e.g., APT36) or Software/Tools (e.g., Crimson RAT - S0334). Threat Report: The North Korean [PLACE…	APT37
You are given a threat report that describes a cyber incident. Any direct mentions of threat actor groups, campaign names, or malware names have been replaced with [PLACEHOLDER]. Your task is to attribute the incident to a known threat actor or malware. Map it to relevant MITRE ATT&CK threat groups (e.g., APT36) or Software/Tools (e.g., Crimson RAT - S0334). Threat Report: Microsoft has recently …	APT33, or Peach Sandstorm, HOLMIUM, or Refined Kitten
You are given a threat report that describes a cyber incident. Any direct mentions of threat actor groups, campaign names, or malware names have been replaced with [PLACEHOLDER]. Your task is to attribute the incident to a known threat actor or malware. Map it to relevant MITRE ATT&CK threat groups (e.g., APT36) or Software/Tools (e.g., Crimson RAT - S0334). Threat Report: In late February 2024, …	APT29
You are given a threat report that describes a cyber incident. Any direct mentions of threat actor groups, campaign names, or malware names have been replaced with [PLACEHOLDER]. Your task is to attribute the incident to a known threat actor or malware. Map it to relevant MITRE ATT&CK threat groups (e.g., APT36) or Software/Tools (e.g., Crimson RAT - S0334). Threat Report: A new and concerning ch…	APT29
You are given a threat report that describes a cyber incident. Any direct mentions of threat actor groups, campaign names, or malware names have been replaced with [PLACEHOLDER]. Your task is to attribute the incident to a known threat actor or malware. Map it to relevant MITRE ATT&CK threat groups (e.g., APT36) or Software/Tools (e.g., Crimson RAT - S0334). Threat Report: Ukrainian security rese…	APT29 (aka Cozy Bear, Nobelium and many other monikers)
You are given a threat report that describes a cyber incident. Any direct mentions of threat actor groups, campaign names, or malware names have been replaced with [PLACEHOLDER]. Your task is to attribute the incident to a known threat actor or malware. Map it to relevant MITRE ATT&CK threat groups (e.g., APT36) or Software/Tools (e.g., Crimson RAT - S0334). Threat Report: Microsoft Threat Intell…	Diamond Sleet (ZINC)
You are given a threat report that describes a cyber incident. Any direct mentions of threat actor groups, campaign names, or malware names have been replaced with [PLACEHOLDER]. Your task is to attribute the incident to a known threat actor or malware. Map it to relevant MITRE ATT&CK threat groups (e.g., APT36) or Software/Tools (e.g., Crimson RAT - S0334). Threat Report: The North Korea-linked …	Lazarus group
You are given a threat report that describes a cyber incident. Any direct mentions of threat actor groups, campaign names, or malware names have been replaced with [PLACEHOLDER]. Your task is to attribute the incident to a known threat actor or malware. Map it to relevant MITRE ATT&CK threat groups (e.g., APT36) or Software/Tools (e.g., Crimson RAT - S0334). Threat Report: [PLACEHOLDER] reuses in…	Lazarus Group
You are given a threat report that describes a cyber incident. Any direct mentions of threat actor groups, campaign names, or malware names have been replaced with [PLACEHOLDER]. Your task is to attribute the incident to a known threat actor or malware. Map it to relevant MITRE ATT&CK threat groups (e.g., APT36) or Software/Tools (e.g., Crimson RAT - S0334). Threat Report: In early February, anal…	Lazarus Group
You are given a threat report that describes a cyber incident. Any direct mentions of threat actor groups, campaign names, or malware names have been replaced with [PLACEHOLDER]. Your task is to attribute the incident to a known threat actor or malware. Map it to relevant MITRE ATT&CK threat groups (e.g., APT36) or Software/Tools (e.g., Crimson RAT - S0334). Threat Report: [PLACEHOLDER] has been …	Lazarus
You are given a threat report that describes a cyber incident. Any direct mentions of threat actor groups, campaign names, or malware names have been replaced with [PLACEHOLDER]. Your task is to attribute the incident to a known threat actor or malware. Map it to relevant MITRE ATT&CK threat groups (e.g., APT36) or Software/Tools (e.g., Crimson RAT - S0334). Threat Report: Prolific Iranian advanc…	OilRig
You are given a threat report that describes a cyber incident. Any direct mentions of threat actor groups, campaign names, or malware names have been replaced with [PLACEHOLDER]. Your task is to attribute the incident to a known threat actor or malware. Map it to relevant MITRE ATT&CK threat groups (e.g., APT36) or Software/Tools (e.g., Crimson RAT - S0334). Threat Report: The Iranian state-align…	MuddyWater,or Crambus
You are given a threat report that describes a cyber incident. Any direct mentions of threat actor groups, campaign names, or malware names have been replaced with [PLACEHOLDER]. Your task is to attribute the incident to a known threat actor or malware. Map it to relevant MITRE ATT&CK threat groups (e.g., APT36) or Software/Tools (e.g., Crimson RAT - S0334). Threat Report: [PLACEHOLDER] is a Russ…	Turla APT (aka Pensive Ursa, Uroburos, Snake)
